# Supplementary material for: In Silico Identification and Validation of Pyroptosis-Related Genes in Chlamydia Respiratory Infection
Source: MDPI journal article supplement (doi:10.3390/ijms241713570), 2023-09-01
Supplement: s1 [file s1]

**Supplementary Table S1. Sequences of primers used in this study.**

| <b>Gene name</b> | <b>Forward primer (5'→3')</b> | <b>Reverse primer (5'→3')</b> |
|------------------|-------------------------------|-------------------------------|
| <i>Tnfa</i>      | CTGAACTTCGGGGTGATCGG          | GGCTTGTCACTCGAATTTTGAGA       |
| <i>IL1β</i>      | GAAATGCCACCTTTTGACAGTG        | ATCTTTTGGGGTCCGTCAACT         |
| <i>Tlr2</i>      | CACCACTGCCCCGTAGATGAAG        | AGGGTACAGTCGTCGAACTCT         |
| <i>Tlr9</i>      | ATGGTTCTCCGTCGAAGGACT         | GAGGCTTCAGCTCACAGGG           |
| <i>Nlrp3</i>     | ATTACCCGCCCCGAGAAAGG          | TCGCAGCAAAGATCCACACAG         |
| <i>Zbp1</i>      | AAGAGTCCCCTGCGATTATTTG        | TCTGGATGGCGTTTGAATTGG         |
| <i>Mefv</i>      | TCATCTGCTAAACACCCTGGA         | GGGATCTTAGAGTGGCCCTTC         |
| <i>Tnfaip3</i>   | GAACAGCGATCAGGCCAGG           | GGACAGTTGGGTGTCTCACATT        |
